# Supplementary material
Source: PubMed Central journal article supplement (PMC6679692)
Supplement: NIHMS861030-supplement-4.pdf [file NIHMS861030-supplement-4.pdf]

**Supplementary Table 2. Summary of MaPSy validation in patient samples**

| HGMD or SNP id | gene    | hg19 position     | nucleotide change | AA change | MaPSy result                                                                                                          | validation result                    | Patient tissue/ RNA source                  | class | Reference / source    |
|----------------|---------|-------------------|-------------------|-----------|-----------------------------------------------------------------------------------------------------------------------|--------------------------------------|---------------------------------------------|-------|-----------------------|
| CM990215       | ATM     | chr11:108186638:+ | c.6095G>A         | p.R2032K  | loss of splicing <i>in vivo</i> (0 fold) and <i>in vitro</i> (0 fold)                                                 | exon 44 skipping                     | lymphoblastoid cell line                    | TP    | <sup>46</sup>         |
| CM980147       | ATM     | chr11:108183151:+ | c.5932G>T         | p.E1978*  | loss of splicing <i>in vivo</i> (0 fold) and <i>in vitro</i> (0 fold), but neither were significant due to low counts | exon 42 skipping                     | lymphoblastoid cell line                    | FN    | <sup>46</sup>         |
| CM940140       | ATP7A   | chrX:77266736:+   | c.1933C>T         | p.R645*   | loss of splicing <i>in vivo</i> (0.4 fold) and <i>in vitro</i> (0.4 fold)                                             | exon 8 skipping                      | fibroblasts                                 | TP    | Coriell               |
| CM994455       | BRCA1   | chr17:41258474:-  | c.211A>G          | p.R71G    | loss of splicing <i>in vivo</i> (0 fold) and <i>in vitro</i> (0.5 fold)                                               | exon 5 skipping                      | T-lymphocytes                               | TP    | <sup>47</sup>         |
| CM950153       | BRCA1   | chr17:41215920:-  | c.5123C>A         | p.A1708E  | loss of splicing <i>in vivo</i> (0.3 fold) and <i>in vitro</i> (0.3 fold)                                             | exon 18 skipping                     | T-lymphocytes                               | TP    | <sup>47</sup>         |
| CM980231       | BRCA1   | chr17:41215963:-  | c.5080G>T         | p.E1694*  | loss of splicing <i>in vivo</i> (0.03 fold) and <i>in vitro</i> (0.1 fold)                                            | exon 18 skipping                     | T-lymphocytes                               | TP    | <sup>48</sup>         |
| CM101977       | BRCA1   | chr17:41267746:-  | c.131G>A          | p.C44Y    | no change                                                                                                             | no change                            | lymphoblastoid cell line                    | TN    | Amanda Toland         |
| CM053138       | BRCA2   | chr13:32921033:+  | c.673A>G          | p.T225A   | no change                                                                                                             | no change                            | T-lymphocytes                               | TN    | <sup>49</sup>         |
| CM042309       | BRCA2   | chr13:32903621:+  | c.7007G>A         | p.R2336H  | loss of splicing <i>in vivo</i> (0.03 fold) and <i>in vitro</i> (0.03 fold)                                           | exon 13 skipping                     | T-lymphocytes                               | TP    | <sup>47</sup>         |
| CM051414       | COL1A1  | chr9:130579482:-  | c.608G>T          | p.G203V   | no change                                                                                                             | no change                            | fibroblast                                  | TN    | Joan Marini           |
| CM051415       | COL1A1  | chr9:130579482:-  | c.634G>A          | p.G212R   | Loss of splicing <i>in vivo</i> (0.1 fold) and <i>in vitro</i> (0.2 fold)                                             | no change                            | fibroblast                                  | FP    | Joan Marini           |
| CM111552       | ENG     | chr9:130579482:-  | c.1687G>T         | p.E563*   | loss of splicing <i>in vivo</i> (0.38 fold) and <i>in vitro</i> (0.2 fold)                                            | loss of exon 13                      | T-lymphocytes                               | TP    | Authors               |
| CM950449       | FBN1    | chr15:48729559:-  | c.6339T>G         | p.Y2113*  | loss of splicing <i>in vivo</i> (0.04 fold) and <i>in vitro</i> (0.2 fold)                                            | exon 51 skipping                     | fibroblasts                                 | TP    | <sup>50</sup>         |
| CM930246       | FBN1    | chr15:48758037:-  | c.4766G>T         | p.C1589F  | loss of splicing <i>in vivo</i> (0.3 fold) and <i>in vitro</i> (0.6 fold)                                             | no change                            | fibroblasts                                 | FP    | Coriell               |
| CM910169       | GALT    | chr9:34648167:+   | c.563A>G          | p.Q188R   | loss of splicing <i>in vivo</i> (0.01 fold) and <i>in vitro</i> (0.4 fold)                                            | missplicing                          | lymphoblastoid cell line                    | TP    | Coriell               |
| CM002632       | HPRT1   | chrX:133632695:+  | c.590A>T          | p.E197V   | loss of splicing <i>in vivo</i> (0 fold) and <i>in vitro</i> (0.3 fold)                                               | exon 8 skipping                      | lymphoblastoid cell line                    | TP    | <sup>51</sup>         |
| CM002633       | HPRT1   | chrX:133632707:+  | c.602A>T          | p.D201V   | loss of splicing <i>in vivo</i> (0.2 fold) and <i>in vitro</i> (0.3 fold)                                             | exon 8 skipping                      | T-lymphocytes                               | TP    | <sup>51</sup>         |
| CM004361       | HPRT1   | chrX:133632674:+  | c.569G>A          | p.G190E   | no change                                                                                                             | no change                            | lymphoblastoid cell line                    | TN    | <sup>51</sup>         |
| CM920361       | HPRT1   | chrX:133632706:+  | c.601G>A          | p.D201N   | no change                                                                                                             | no change                            | lymphoblastoid cell line                    | TN    | <sup>51</sup>         |
| CM920362       | HPRT1   | chrX:133632706:+  | c.601G>T          | p.D201Y   | loss of splicing <i>in vivo</i> (0.18 fold) but not <i>in vitro</i>                                                   | no change                            | lymphoblastoid cell line and T lymphocytes  | TN    | <sup>51</sup>         |
| CM022413       | ITPA    | chr20:3193842:+   | c.94C>A           | p.P32T    | loss of splicing <i>in vivo</i> (0.1 fold) and <i>in vitro</i> (0.3 fold)                                             | exon 3 skipping                      | lymphoblastoid cell line and T-lymphocytes  | TP    | Coriell <sup>52</sup> |
| CM045463       | MLH1    | chr3:37053590:+   | c.677G>A          | p.R226Q   | loss of splicing <i>in vivo</i> (0 fold) and <i>in vitro</i> (0.01 fold)                                              | loss of exon 8                       | whole blood                                 | TP    | <sup>53</sup>         |
| CM960965       | MLH1    | chr3:37045935:+   | c.350C>T          | p.T117M   | no change                                                                                                             | no change                            | lymphoblastoid cell line                    | TN    | <sup>54</sup>         |
| CM068362       | MLH1    | chr3:37045923:+   | c.338T>A          | p.V113D   | loss of splicing <i>in vivo</i> (0.6 fold) but no change <i>in vitro</i>                                              | no change                            | lymphoblastoid cell line                    | TN    | <sup>54</sup>         |
| CM000176       | MLH1    | chr3:37053550:+   | c.637G>A          | p.V213M   | loss of splicing <i>in vivo</i> (0.6 fold) and <i>in vitro</i> (0.65 fold)                                            | no change                            | lymphoblastoid cell line                    | FP    | <sup>54</sup>         |
| CM041068       | PSEN1   | chr14:73653628:+  | c.548G>T          | p.G1883V  | loss of splicing <i>in vivo</i> (0.3 fold) and <i>in vitro</i> (0.1 fold)                                             | brain-specific loss of exons 6 and 7 | frontal cortex (post mortem)                | TP    | <sup>55</sup>         |
| CM064173       | PSEN1   | chr14:73673096:+  | c.871A>C          | p.T291P   | no change                                                                                                             | exon 9 skipping                      | Whole blood                                 | FN    | <sup>56</sup>         |
| CM054825       | PSEN1   | chr14:73653589:+  | c.509C>T          | p.S170F   | no change <i>in vivo</i> but loss of splicing <i>in vitro</i> (0.5 fold)                                              | no change                            | frontal cortex and cerebellum (post mortem) | TN    | Alison Goate          |
| rs2295682      | RBM23   | chr14:23374862:-  | c.408G>A          | p.R136    | loss of splicing <i>in vivo</i> (0.3 fold) and <i>in vitro</i> (0.5 fold)                                             | exon 6 skipping                      | lymphoblastoid cell line                    | TP    | <sup>57</sup>         |
| CM075012       | SLC12A3 | chr16:56902212:+  | c.433C>T          | p.R145C   | loss of splicing <i>in vivo</i> (0.4 fold) and <i>in vitro</i> (0.6 fold) but neither were significant                | exon 7 skipping                      | whole blood                                 | FN    | <sup>58</sup>         |
| CM115034       | TAZ     | chrX:153647918:+  | c.497T>A          | p.L166*   | loss of splicing <i>in vivo</i> (0.3 fold) and <i>in vitro</i> (0.5 fold)                                             | exon 6 and 7 skipping                | lymphoblastoid cell line                    | TP    | Coriell               |
| CM067040       | TAZ     | chrX:153641901:+  | c.367C>T          | p.R123*   | loss of splicing <i>in vivo</i> (0.6 fold) and <i>in vitro</i> (0.4 fold)                                             | intron retention                     | lymphoblastoid cell line                    | TP    | Coriell               |

**Supplementary Table 4.** ENCODE Accession numbers used for the purpose of validating MaPSy results

| <i>ENCODE Accession Number</i> |
|--------------------------------|
| SRR307897                      |
| SRR307898                      |
| SRR307901                      |
| SRR307902                      |
| SRR307903                      |
| SRR307904                      |
| SRR307905                      |
| SRR307906                      |
| SRR307907                      |
| SRR307908                      |
| SRR307911                      |
| SRR307912                      |
| SRR307920                      |
| SRR307926                      |
| SRR307927                      |
| SRR307932                      |
| SRR307933                      |
| SRR315301                      |
| SRR315302                      |
| SRR315313                      |
| SRR315314                      |
| SRR315315                      |
| SRR315316                      |
| SRR315327                      |
| SRR315328                      |
| SRR315329                      |
| SRR315330                      |
| SRR315331                      |
| SRR315336                      |
| SRR315337                      |
| SRR534301                      |
| SRR534302                      |
| SRR534309                      |
| SRR534310                      |
| SRR534319                      |
| SRR534320                      |
| SRR534321                      |
| SRR534322                      |
| SRR534323                      |
| SRR534324                      |
| SRR545695                      |
| SRR545696                      |
| SRR545697                      |
| SRR545698                      |
| SRR545699                      |
| SRR545700                      |

## References

46. Teraoka, S.N. *et al.* Splicing defects in the ataxia-telangiectasia gene, ATM: underlying mutations and consequences. *American Journal of Human Genetics* **64**, 1617-31 (1999).
47. Sanz, D.J. *et al.* A high proportion of DNA variants of BRCA1 and BRCA2 is associated with aberrant splicing in breast/ovarian cancer patients. *Clin Cancer Res* **16**, 1957-67 (2010).
48. Mazoyer, S. *et al.* A BRCA1 nonsense mutation causes exon skipping. *Am J Hum Genet* **62**, 713-5 (1998).
49. Sharp, A., Pichert, G., Lucassen, A. & Eccles, D. RNA analysis reveals splicing mutations and loss of expression defects in MLH1 and BRCA1. *Hum Mutat* **24**, 272 (2004).
50. Dietz, H.C. *et al.* The skipping of constitutive exons in vivo induced by nonsense mutations. *Science* **259**, 680-3 (1993).
51. Tu, M., Tong, W., Perkins, R. & Valentine, C.R. Predicted changes in pre-mRNA secondary structure vary in their association with exon skipping for mutations in exons 2, 4, and 8 of the Hprt gene and exon 51 of the fibrillin gene. *Mutat Res* **432**, 15-32 (2000).
52. Arenas, M., Duley, J., Sumi, S., Sanderson, J. & Marinaki, A. The ITPA c.94C>A and g.IVS2+21A>C sequence variants contribute to missplicing of the ITPA gene. *Biochim Biophys Acta* **1772**, 96-102 (2007).
53. Pagenstecher, C. *et al.* Aberrant splicing in MLH1 and MSH2 due to exonic and intronic variants. *Human Genetics* **119**, 9-22 (2006).
54. Auclair, J. *et al.* Systematic mRNA analysis for the effect of MLH1 and MSH2 missense and silent mutations on aberrant splicing. *Hum Mutat* **27**, 145-54 (2006).
55. Dermaut, B. *et al.* A novel presenilin 1 mutation associated with Pick's disease but not beta-amyloid plaques. *Ann Neurol* **55**, 617-26 (2004).
56. Dumanchin, C. *et al.* Biological effects of four PSEN1 gene mutations causing Alzheimer disease with spastic paraparesis and cotton wool plaques. *Hum Mutat* **27**, 1063 (2006).
57. Hull, J. *et al.* Identification of common genetic variation that modulates alternative splicing. *PLoS Genet* **3**, e99 (2007).
58. Riveira-Munoz, E. *et al.* Transcriptional and functional analyses of SLC12A3 mutations: new clues for the pathogenesis of Gitelman syndrome. *J Am Soc Nephrol* **18**, 1271-83 (2007).
